# Supplementary material for: ACE Inhibitory Peptide from Skin Collagen Hydrolysate of Takifugu bimaculatus as Potential for Protecting HUVECs Injury
Source: MDPI journal article supplement (doi:10.3390/md19120655), 2021-11-24
Supplement: s1 [file s1]

# ACE Inhibitory Peptide from Skin Collagen Hydrolysate of *Takifugu bimaculatus* as Potential for Protecting HUVECs Injury

Shuilin Cai <sup>1,2</sup>, Nan Pan <sup>2</sup>, Min Xu <sup>2,3</sup>, Yongchang Su <sup>1,2</sup>, Kun Qiao <sup>2</sup>, Bei Chen <sup>2</sup>, Bingde Zheng <sup>1\*</sup>, Meitian Xiao <sup>1\*</sup>, and Zhiyu Liu <sup>2\*</sup>

<sup>1</sup> College of Chemical Engineering, Huaqiao University, Xiamen 361021, China  
<sup>2</sup> Key Laboratory of Cultivation and High-value Utilization of Marine Organisms in Fujian Province, Fisheries Research Institute of Fujian, Xiamen 361013, China  
<sup>3</sup> College of Food and Biological Engineering, Jimei University, Xiamen, 361021, China  
\* Correspondence: bingd.zheng@hqu.edu.cn (B. Z.); mt Xiao@hqu.edu.cn (M. X.); 13906008638@163.com (Z. L.)

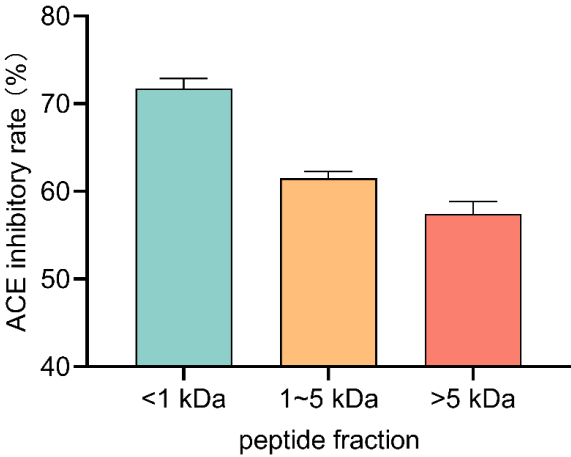

**Figure S1.** Effects of different peptide fractions on ACEI rate. TBSH-I (MW < 1 kDa), TBSH-II (1 kDa < MW < 5 kDa), and TBSH-III (MW > 5 kDa). The values were expressed as the means  $\pm$  SD, n = 3. The mean ACEI rate was measured at 1 mg/mL.

**Table S1.** Peptide sequences identified by LC-MS/MS

| NO | Peptide | ALC (%) | length | Mass     | m/z      | z | local confidence (%) |
|----|---------|---------|--------|----------|----------|---|----------------------|
| 1  | FAGF    | 96      | 4      | 440.2059 | 441.2133 | 1 | 96 92 99 99          |
| 2  | FPSK    | 96      | 4      | 477.2587 | 478.2701 | 1 | 99 91 98 97          |
| 3  | LA AF   | 98      | 4      | 420.2372 | 421.2439 | 1 | 98 97 100 99         |
| 4  | LAPL    | 96      | 4      | 412.2686 | 413.2756 | 1 | 98 95 97 96          |
| 5  | LCPT    | 95      | 4      | 432.2043 | 433.2112 | 1 | 98 93 95 97          |
| 6  | LGPK    | 95      | 4      | 413.2638 | 414.2709 | 1 | 97 91 97 97          |
| 7  | LPLP    | 96      | 4      | 438.2842 | 439.2913 | 1 | 93 97 99 98          |

Continued Table S1. Peptide sequences identified by LC-MS/MS

|    |       |    |   |          |          |   |                   |
|----|-------|----|---|----------|----------|---|-------------------|
| 8  | LPMP  | 97 | 4 | 456.2406 | 457.2477 | 1 | 98 96 99 98       |
| 9  | LPPE  | 95 | 4 | 454.2427 | 455.2493 | 1 | 98 90 96 96       |
| 10 | LVPF  | 97 | 4 | 474.2842 | 475.2921 | 1 | 97 96 99 96       |
| 11 | LVPL  | 95 | 4 | 440.2999 | 441.3082 | 1 | 97 91 96 97       |
| 12 | MVVP  | 95 | 4 | 444.2406 | 445.2476 | 1 | 94 95 98 95       |
| 13 | PGLM  | 95 | 4 | 416.2094 | 417.2165 | 1 | 97 95 96 95       |
| 14 | RAGP  | 95 | 4 | 399.223  | 400.2269 | 1 | 99 90 97 95       |
| 15 | TLPP  | 95 | 4 | 426.2478 | 427.2552 | 1 | 95 92 98 99       |
| 16 | VDDS  | 98 | 4 | 434.1649 | 435.1722 | 1 | 99 99 100 99      |
| 17 | VGDF  | 95 | 4 | 436.1958 | 437.2031 | 1 | 93 88 99 99       |
| 18 | VLAL  | 96 | 4 | 414.2842 | 415.2915 | 1 | 95 93 99 99       |
| 19 | VLLL  | 97 | 4 | 456.3311 | 457.3386 | 1 | 94 98 100 99      |
| 20 | VPPL  | 95 | 4 | 424.2686 | 425.2755 | 1 | 96 92 98 94       |
| 21 | VVGF  | 99 | 4 | 420.2372 | 421.2437 | 1 | 100 99 100 99     |
| 22 | VVGW  | 99 | 4 | 459.2482 | 460.2547 | 1 | 100 99 100 99     |
| 23 | WGPE  | 95 | 4 | 487.2067 | 488.2142 | 1 | 98 92 95 96       |
| 24 | AVGPL | 98 | 5 | 455.2744 | 456.2819 | 1 | 95 97 100 100 100 |
| 25 | DLDTK | 95 | 5 | 590.2911 | 591.2991 | 1 | 88 93 99 100 99   |
| 26 | DMFPK | 98 | 5 | 636.2941 | 637.3012 | 1 | 97 96 100 100 99  |
| 27 | EPGVP | 95 | 5 | 497.2485 | 498.2566 | 1 | 99 98 97 95 88    |
| 28 | FFGGL | 98 | 5 | 539.2744 | 540.2819 | 1 | 99 98 99 99 97    |
| 29 | GPGVP | 98 | 5 | 425.2274 | 426.2337 | 1 | 99 98 99 99 99    |
| 30 | GPGYP | 98 | 5 | 489.2223 | 490.2296 | 1 | 96 98 99 99 98    |
| 31 | KPGSP | 96 | 5 | 484.2645 | 485.2719 | 1 | 100 98 97 95 91   |
| 32 | LGTVP | 95 | 5 | 485.2849 | 486.2933 | 1 | 97 94 96 96 92    |
| 33 | LGVGP | 96 | 5 | 441.2587 | 442.266  | 1 | 95 94 97 98 97    |
| 34 | LHLFK | 97 | 5 | 656.4009 | 657.4071 | 1 | 92 98 100 99 98   |
| 35 | LLAPP | 96 | 5 | 509.3213 | 510.3284 | 1 | 94 92 99 98 99    |
| 36 | LLPPL | 98 | 5 | 551.3682 | 552.376  | 1 | 99 99 99 96 97    |
| 37 | PGGPR | 98 | 5 | 482.2601 | 483.2682 | 1 | 98 98 99 99 99    |
| 38 | VGGPF | 95 | 5 | 475.243  | 476.2506 | 1 | 99 98 97 92 92    |

Continued Table S1. Peptide sequences identified by LC-MS/MS

| NO | Peptide  | ALC (%) | length | Mass     | <i>m/z</i> | <i>z</i> | local confidence (%)     |
|----|----------|---------|--------|----------|------------|----------|--------------------------|
| 39 | VGGPY    | 99      | 5      | 491.238  | 492.2452   | 1        | 99 100 100 100 100       |
| 40 | VVGPF    | 95      | 5      | 517.29   | 518.2969   | 1        | 97 96 99 98 88           |
| 41 | VVGPL    | 96      | 5      | 483.3057 | 484.313    | 1        | 100 99 99 94 92          |
| 42 | VVVNP    | 95      | 5      | 526.3115 | 527.3185   | 1        | 99 97 98 93 92           |
| 43 | EVDELRL  | 96      | 6      | 759.3763 | 760.3831   | 1        | 95 93 99 99 96 95        |
| 44 | FDLLRF   | 95      | 6      | 809.4435 | 405.7294   | 2        | 95 97 99 95 90 95        |
| 45 | FNLRMQ   | 97      | 6      | 807.4061 | 404.7106   | 2        | 98 93 98 98 98 97        |
| 46 | FPFLFR   | 98      | 6      | 825.4537 | 413.7334   | 2        | 97 97 99 99 99 99        |
| 47 | GLPSVP   | 96      | 6      | 568.322  | 569.3293   | 1        | 92 97 98 99 98 98        |
| 48 | KLPDGE   | 96      | 6      | 657.3333 | 658.3407   | 1        | 100 99 98 95 90 96       |
| 49 | KSPVVP   | 97      | 6      | 625.3799 | 626.3879   | 1        | 99 95 95 98 99 99        |
| 50 | KYPLER   | 97      | 6      | 804.4493 | 403.2318   | 2        | 100 99 98 92 98 99       |
| 51 | LGSPGR   | 96      | 6      | 585.3234 | 586.3307   | 1        | 98 96 97 95 97 99        |
| 52 | PGPGPM   | 97      | 6      | 554.2523 | 555.2615   | 1        | 96 100 100 99 98 92      |
| 53 | STPDLE   | 95      | 6      | 660.2966 | 661.3029   | 1        | 95 95 93 95 94 97        |
| 54 | VGPSVP   | 98      | 6      | 554.3064 | 555.3124   | 1        | 96 96 99 100 100 99      |
| 55 | WLPLFK   | 96      | 6      | 802.4741 | 402.2439   | 2        | 97 97 97 97 95 96        |
| 56 | DDLVEPR  | 96      | 7      | 842.4134 | 422.2131   | 2        | 92 90 98 98 99 98 98     |
| 57 | ELPVLLK  | 95      | 7      | 810.5214 | 406.268    | 2        | 85 84 99 100 100 100 100 |
| 58 | ETAPGMP  | 96      | 7      | 701.3054 | 702.3119   | 1        | 99 98 98 97 95 91 96     |
| 59 | FEGPGSP  | 97      | 7      | 689.302  | 690.3085   | 1        | 97 97 95 99 99 99 98     |
| 60 | FHLPHGL  | 95      | 7      | 819.4391 | 410.7264   | 2        | 99 94 99 98 93 94 95     |
| 61 | FPPDGLR  | 96      | 7      | 800.418  | 401.2152   | 2        | 94 94 94 97 98 99 98     |
| 62 | KFDPVLR  | 98      | 7      | 873.5072 | 437.761    | 2        | 97 97 100 98 98 99 99    |
| 63 | LALPWLK  | 95      | 7      | 839.5269 | 420.7708   | 2        | 89 89 99 97 97 99 98     |
| 64 | LAPPERK  | 95      | 7      | 809.4759 | 405.7452   | 2        | 100 100 100 99 93 82 92  |
| 65 | LDKVRFL  | 95      | 7      | 889.5385 | 445.7768   | 2        | 90 96 98 96 94 95 96     |
| 66 | WKPTDD   | 95      | 7      | 857.3919 | 429.7029   | 2        | 77 91 100 99 98 100 100  |
| 67 | AGGYTRLL | 98      | 8      | 849.4708 | 425.7425   | 2        | 99 99 99 98 98 98 99 100 |
| 68 | EAAPLNPK | 95      | 8      | 838.4548 | 420.2346   | 2        | 94 94 100 98 95 89 94 97 |

**Continued Table S1.** Peptide sequences identified by LC-MS/MS

| NO | Peptide    | ALC (%) | length | Mass     | <i>m/z</i> | <i>z</i> | local confidence (%) |    |     |     |     |     |     |    |     |    |
|----|------------|---------|--------|----------|------------|----------|----------------------|----|-----|-----|-----|-----|-----|----|-----|----|
| 69 | EGAPLNPK   | 95      | 8      | 824.4391 | 413.2268   | 2        | 82                   | 85 | 100 | 100 | 99  | 97  | 98  | 99 |     |    |
| 70 | GPGFPGER   | 95      | 8      | 815.3926 | 408.7035   | 2        | 95                   | 97 | 96  | 95  | 96  | 87  | 95  | 98 |     |    |
| 71 | LLAPPELR   | 96      | 8      | 907.5491 | 454.7819   | 2        | 92                   | 95 | 100 | 99  | 96  | 97  | 97  | 96 |     |    |
| 72 | LLAPPEVK   | 97      | 8      | 865.5273 | 433.7694   | 2        | 99                   | 99 | 100 | 100 | 90  | 92  | 99  | 99 |     |    |
| 73 | LLAPPEVR   | 98      | 8      | 893.5334 | 447.7736   | 2        | 98                   | 98 | 99  | 99  | 97  | 98  | 97  | 98 |     |    |
| 74 | QPGPPNPR   | 96      | 8      | 861.4457 | 431.7296   | 2        | 93                   | 98 | 99  | 98  | 93  | 94  | 98  | 99 |     |    |
| 75 | TLPTTSPK   | 95      | 8      | 843.4702 | 422.7421   | 2        | 90                   | 84 | 99  | 99  | 99  | 98  | 98  | 99 |     |    |
| 76 | LLPGNLLVR  | 98      | 9      | 993.6335 | 497.824    | 2        | 99                   | 99 | 100 | 99  | 97  | 99  | 99  | 98 | 98  |    |
| 77 | TLLPGLGKL  | 95      | 9      | 910.5851 | 456.2998   | 2        | 96                   | 98 | 100 | 96  | 86  | 92  | 96  | 98 | 98  |    |
| 78 | VGGPSPAGP  | 98      | 9      | 737.3708 | 738.3781   | 1        | 99                   | 98 | 99  | 99  | 99  | 97  | 98  | 99 | 100 |    |
| 79 | WFRDGQELR  | 96      | 9      | 1205.594 | 402.8715   | 3        | 100                  | 99 | 99  | 100 | 98  | 90  | 97  | 94 | 94  |    |
| 80 | YSPGASGPK  | 97      | 9      | 862.4185 | 432.2167   | 2        | 93                   | 92 | 99  | 98  | 97  | 99  | 99  | 99 | 100 |    |
| 81 | FERPDLLERP | 96      | 10     | 1270.667 | 424.5629   | 3        | 99                   | 99 | 97  | 96  | 99  | 100 | 98  | 95 | 92  | 95 |
| 82 | PGSGPSPGAP | 97      | 10     | 822.3871 | 823.3948   | 1        | 92                   | 92 | 99  | 100 | 100 | 100 | 100 | 98 | 98  | 98 |

**Continued Table S2.** Sequences and score of potential bioactive peptides

| Sequences  | Docking Score (kcal/mol) | Sequence  | Docking Score (kcal/mol) | Sequence | Docking Score (kcal/mol) |
|------------|--------------------------|-----------|--------------------------|----------|--------------------------|
| WFRDGQELR  | -19.69                   | EGAPLNPK  | -14.71                   | LGVGP    | -11.46                   |
| LLAPPEVR   | -18.47                   | TLPTTSPK  | -14.44                   | VVGPF    | -11.46                   |
| FERPDLLERP | -18.28                   | ETAPGMP   | -14.26                   | GPGYP    | -11.32                   |
| LLAPPELR   | -17.27                   | LGSPGR    | -14.08                   | VGGPY    | -11.30                   |
| LLAPPEVK   | -16.85                   | FPFLFR    | -13.99                   | LVPF     | -10.89                   |
| WKPPTDD    | -16.71                   | LPPE      | -13.80                   | LAPL     | -10.84                   |
| ELPVLLK    | -16.47                   | FHLPHGL   | -13.74                   | VVGW     | -10.81                   |
| TLLPGLGKL  | -16.42                   | DLDTK     | -13.61                   | MVVP     | -10.80                   |
| LALPWLK    | -16.37                   | WLPLFK    | -13.56                   | VLAL     | -10.76                   |
| EVDELRL    | -16.29                   | FEGPGSP   | -13.43                   | FAGF     | -10.48                   |
| FDLLRF     | -16.27                   | VGGPSPAGP | -13.39                   | VVGPL    | -10.46                   |

**Table S2.** Sequences and score of potential bioactive peptides

|            |        |        |        |       |        |
|------------|--------|--------|--------|-------|--------|
| FPPDGLR    | -16.16 | WGPE   | -13.31 | VVVNP | -10.43 |
| STPDLE     | -15.96 | GLPSVP | -12.99 | VLLL  | -10.39 |
| FNLRMQ     | -15.80 | KSPVVP | -12.97 | FPSK  | -10.32 |
| KFDPVLR    | -15.73 | EPGVP  | -12.92 | LVPL  | -10.20 |
| LAPPERK    | -15.70 | LHLFK  | -12.52 | VPPL  | -10.17 |
| LLPGNLLVR  | -15.67 | VDDS   | -12.47 | RAGP  | -10.15 |
| PGSGPSPGAP | -15.67 | PGPGPM | -12.12 | LPLP  | -10.12 |
| KLPDGE     | -15.66 | LLPPL  | -12.10 | VVGF  | -9.79  |
| QPGPPNPR   | -15.60 | VGDF   | -12.09 | LAAP  | -9.49  |
| GPGFPGER   | -15.59 | VGPSVP | -11.91 | LGPK  | -9.49  |
| YSPGASGPK  | -15.48 | AVGPL  | -11.90 | GPGVP | -9.44  |
| EAAPLNPK   | -15.40 | FFGGL  | -11.75 | TLPP  | -9.44  |
| DDLVEPR    | -15.27 | LGTVP  | -11.71 | LCPT  | -9.44  |
| DMFPK      | -15.18 | PGGPR  | -11.67 | LPMP  | -9.36  |
| LDKVRFL    | -15.14 | LLAPP  | -11.65 | PGLM  | -9.34  |
| KYPLER     | -14.83 | VGGPF  | -11.64 |       |        |
| AGGYTRLL   | -14.82 | KPGSP  | -11.47 |       |        |

**Table S3.** The sequences of chemically synthesized peptide with ACEI activity.

| Sequence   | ACEI rate (%) | Sequence   | ACEI rate (%) | Sequence  | ACEI rate (%) |
|------------|---------------|------------|---------------|-----------|---------------|
| WFRDGQELR  | 59.76±1.63    | FPPDGLR    | 47.18±1.26    | GPGFPGER  | 26.59±0.77    |
| LLAPPEVR   | 35.36±0.97    | STPDLE     | 21.29±0.78    | YSPGASGPK | 18.65±0.61    |
| FERPDLLERP | 28.21±1.12    | FNLRMQ     | 80.35±1.81    | EAAPLNPK  | 16.34±0.68    |
| LLAPPELR   | 40.06±0.45    | KFDPVLR    | 28.03±0.71    | DDLVEPR   | 27.25±1.01    |
| LLAPPEVK   | 44.39±0.54    | LAPPERK    | 37.32±1.05    | DMFPK     | 36.93±0.97    |
| WKPTDD     | 41.27±1.08    | PGSGPSPGAP | 34.86±1.05    | LDKVRFL   | 31.86±0.94    |
| TLLPGLGKL  | 36.59±0.83    | KLPDGE     | 31.14±0.95    |           |               |
| EVDELRL    | 29.73±0.58    | QPGPPNPR   | 25.36±0.71    |           |               |

Note: It is necessary to evaluate the feasibility of all peptide sequences before synthesis. Therefore, we assessed the feasibility of the synthesis process of these potential peptides with the help of an analyzing tool (<https://www.genscript.com/tools/peptide-analyzing-tool>). Finally, a total of 22 peptides were chemically synthesized and tested for ACEI activity. The values were expressed as the means ± SD, n = 3. The mean ACEI rate was measured at 1 mg/mL.

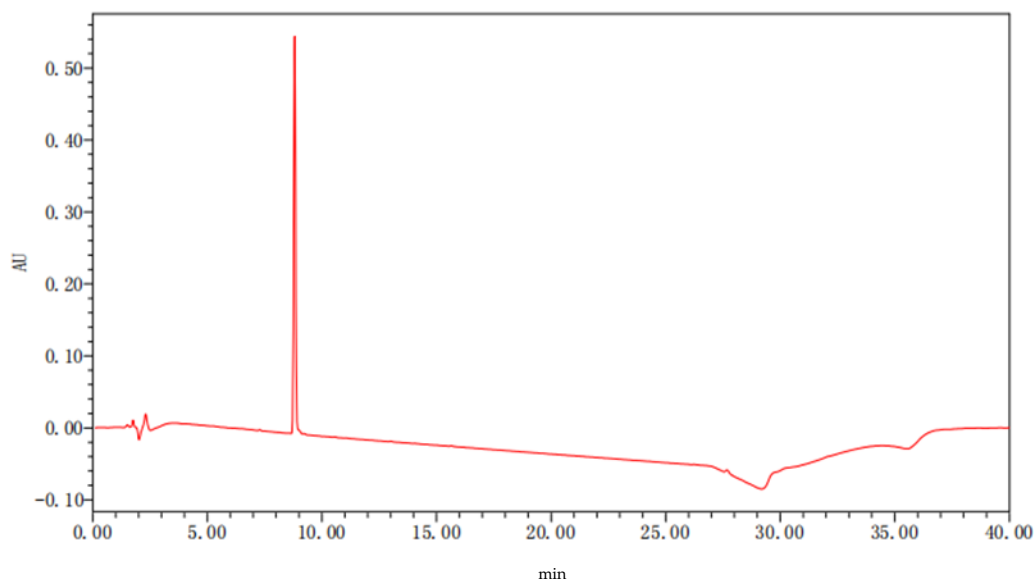

**Figure S2.** HPLC of synthetic peptide FNLRMQ

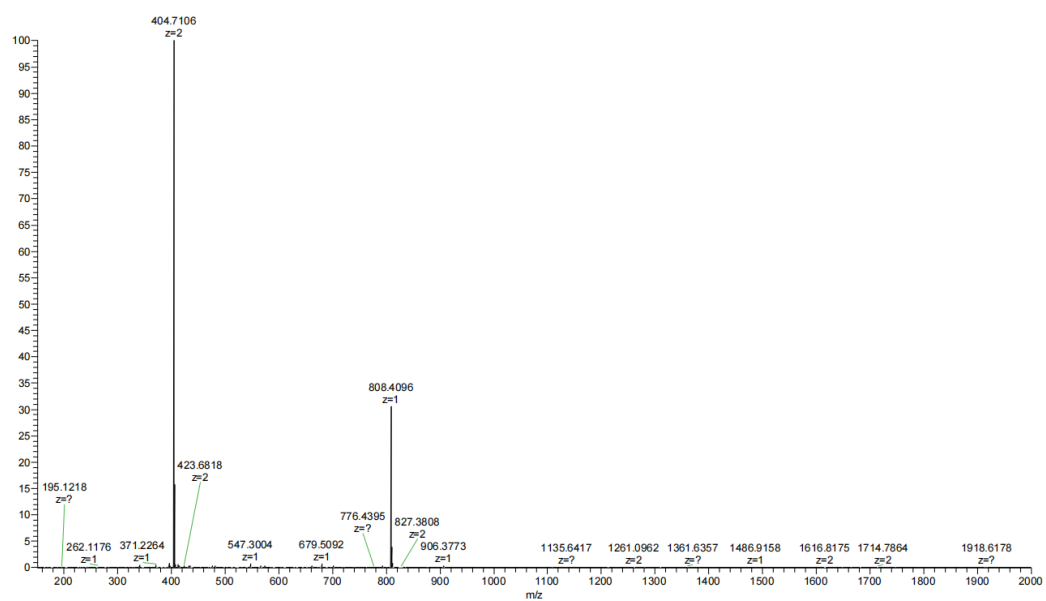

**Figure S3.** MS of synthetic peptide FNLRMQ

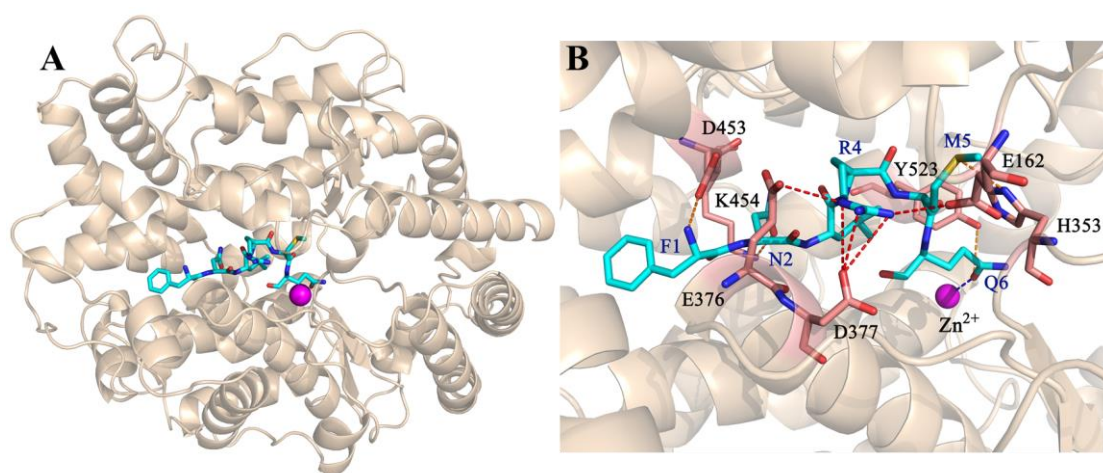

**Figure S4.** The binding mode of FNLRMQ with ACE. (A) The binding mode of FNLRMQ with ACE. (B) The detail binding mode of FNLRMQ with ACE. FNLRMQ is depicted as cyan stick,  $Zn^{2+}$  is depicted as a sphere (magenta). The backbone of ACE is depicted as wheat cartoon with transparency, the surrounding residues in the binding pockets are colored in pink. H bonds, salt bridges, and interactions with  $Zn^{2+}$  are shown as orange, red, and blue dashes lines

**Table S4.** The contact list between FNLRMQ and ACE.

| ChainA | Residue   | ChainB | Residue | Interaction type          |
|--------|-----------|--------|---------|---------------------------|
| ACE    | His353    | FNLRMQ | M5      | Hydrogen bond interaction |
| ACE    | Asp453    | FNLRMQ | F1      | Hydrogen bond interaction |
| ACE    | Lys454    | FNLRMQ | N2      | Hydrogen bond interaction |
| ACE    | Tyr523    | FNLRMQ | Q6      | Hydrogen bond interaction |
| ACE    | $Zn^{2+}$ | FNLRMQ | Q6      | Ion contact               |
| ACE    | Glu162    | FNLRMQ | R4      | Salt bridge               |
| ACE    | Glu376    | FNLRMQ | R4      | Salt bridge               |
| ACE    | Asp377    | FNLRMQ | R4      | Salt bridge               |

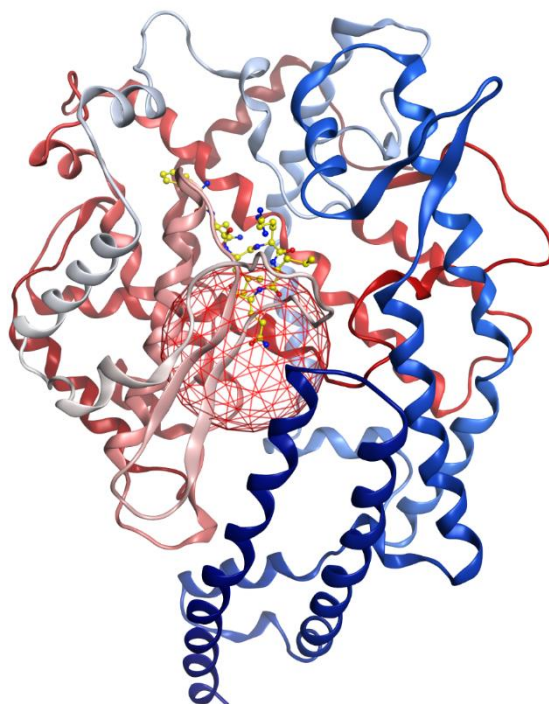

Figure S5. The binding pocket in protein ACE.

Note: Angiotensin I-converting enzyme (ACE, EC3.4.15.1, dipeptidyl carboxypeptidase) is a  $\text{Zn}^{2+}$ -dependent membrane-bounded protein that consisted of four characteristic sectors, namely, the signal peptide, functional domain, transmembrane structure and intracellular region [1]. Among them, the functional domain is subdivided into two different structural domains (N-domain and C-domain), and the two homologous structural domains are connected by 15 amino acid residues. Both homologous structural domains contain the  $\text{Zn}^{2+}$ -binding module HEXXH (H for His, histidine; E for Glu, glutamic acid; X for any amino acid residue) [1]. The catalytic region of the ACE structural domain contains three active pockets: S1 (Ala354, Glu384, and Tyr523), S2 (Gln281, His353, Lys511, and Tyr520) and S1' (Glu 162) [2].

## References

1. Natesh, R.; Schwager, S. L.; Sturrock, E. D.; Acharya, K. R., Crystal structure of the human angiotensin-converting enzyme-lisinopril complex. *Nature* 2003, 421, 551-4.
2. Spyroulias, G. A.; Galanis, A. S.; Pairas, G.; Manessi-Zoupa, E.; Cordopatis, P., Structural features of angiotensin-I converting enzyme catalytic sites: conformational studies in solution, homology models and comparison with other zinc metallopeptidases. *Curr. Top. Med. Chem.* 2004, 4, 403-29.
